# Supplementary material
Source: PubMed Central journal article supplement (PMC139981)
Supplement: 1471-2202-3-16-S1.pdf [file 1471-2202-3-16-S1.pdf]

| Category                                | Descriptions                                          | Accession Number | Naïve Mean intensity ± S.D. |           | Axotomy Mean intensity ± S.D. | Fold change | P value |                   | Known Regulation        |
|-----------------------------------------|-------------------------------------------------------|------------------|-----------------------------|-----------|-------------------------------|-------------|---------|-------------------|-------------------------|
| G Protein Coupled Receptors             | α2-adrenergic receptor                                | M62372           |                             | A         |                               |             |         |                   | ↑ <sup>(27,28)</sup>    |
|                                         | α2-C4 adrenergic receptor                             | X57659           |                             | A         |                               |             |         |                   | ↓ <sup>(27)</sup>       |
|                                         | Angiotensin II receptor type 1 (AT1)                  | M74054           |                             | A         |                               |             |         |                   | ↑ <sup>(29)</sup>       |
|                                         | Angiotensin II receptor type 2 (AT2)                  | D16840           |                             | A         |                               |             |         |                   | ↑ <sup>(29)</sup>       |
|                                         | Bradykinin B1 receptor                                | AJ132230         | 2174 ± 1336                 |           | 1344 ± 149                    | -1.6        | 0.3945  |                   | ↑ <sup>(30)</sup>       |
|                                         | Bradykinin B2 receptor                                | X80187           |                             | A         |                               |             |         |                   | ↑ <sup>(30)</sup>       |
|                                         | Cholecystokinin-B receptor                            | M99418           | 587 ± 145                   |           | 534 ± 56                      | -1.1        | 0.6011  |                   | ↑ <sup>(31,32)</sup>    |
|                                         | Galanin receptor type 1                               | U30290           |                             | A         |                               |             |         |                   | ↓ <sup>(33,34)</sup>    |
|                                         | Galanin receptor type 2                               | U94322           |                             | A         |                               |             |         |                   | ↓ <sup>(34,35)</sup>    |
|                                         | NPY receptor type 1 (NPY-Y1)                          | Z11504           | 1826 ± 394                  |           | 1409 ± 124                    | -1.3        | 0.2011  |                   | ↓ <sup>(36,37)</sup>    |
|                                         | μ opioid receptor (MOR)                               | S77863           | 492 ± 187                   |           | 155 ± 103                     | -3.2        | 0.0686  |                   | ↓ <sup>(38)</sup>       |
| δ opioid receptor (DOR)                 | U00475                                                |                  | A                           |           |                               |             |         | ↓ <sup>(39)</sup> |                         |
| Ligand-gated Ion channel Receptors      | GABA-A receptor α2 subunit                            | L08491           | 2126 ± 867                  |           | 1311 ± 515                    | -1.6        | 0.2491  |                   | NC <sup>(40)</sup>      |
|                                         | GABA-A receptor γ2 subunit                            | L08497           | 2945 ± 913                  |           | 2017 ± 176                    | -1.5        | 0.2176  |                   | ↓ <sup>(41)</sup>       |
|                                         | P2X3 receptor                                         | X90651           | 9249 ± 1527                 |           | 8781 ± 839                    | -1.1        | 0.6723  |                   | ↓ <sup>(41,42)</sup>    |
|                                         | Vanilloid receptor 1                                  | AF029310         | 2859 ± 236                  |           | 1551 ± 28                     | -1.8        | 0.0098  | **                | ↓ <sup>(43)</sup>       |
| Receptor Tyrosine Kinases               | p75 (low affinity nerve growth factor receptor)       | U25650           |                             | A         |                               |             |         |                   | ↓ <sup>(44)</sup>       |
|                                         | GFRα1 (RET ligand 1)                                  | U97142           | 4132 ± 755                  |           | 8443 ± 581                    | 2.0         | 0.0019  | **                | ↑ <sup>(45)</sup>       |
|                                         | GFRα2 (RET ligand 2)                                  | U97143           | 5666 ± 302                  |           | 3264 ± 477                    | -1.7        | 0.0034  | **                | ↓ <sup>(45)</sup>       |
|                                         | TrkA (trk precursor)                                  | M85214           | 13,953 ± 2027               |           | 11,032 ± 1075                 | -1.3        | 0.1134  |                   | ↓ <sup>(46,47)</sup>    |
| Cytokines/Growth Factors/Neuropeptides  | Brain-derived neurotrophic factor                     | D10938           | 951 ± 217                   |           | 1509 ± 115                    | 1.6         | 0.0286  | *                 | ↑ <sup>(6,48,49)</sup>  |
|                                         | β-type calcitonin gene-related peptide                | M11596           | 9689 ± 291                  |           | 5922 ± 785                    | -1.6        | 0.0078  | **                | ↓ <sup>(6,50)</sup>     |
|                                         | α-type calcitonin gene-related peptide                | M11597           | 18,580 ± 795                |           | 11,460 ± 2223                 | -1.6        | 0.0211  | *                 | ↓ <sup>(50)</sup>       |
|                                         | Cholecystokinin precursor                             | X01032           |                             | A         |                               |             |         |                   | ↑ <sup>(51)</sup>       |
|                                         | Basic fibroblast growth factor                        | M22427           |                             | A         |                               |             |         |                   | ↑ <sup>(6,52)</sup>     |
|                                         | Galanin                                               | J03624           | 858 ± 269                   |           | 24,746 ± 1223                 | 28.8        | 0.0005  | ***               | ↑ <sup>(6,53)</sup>     |
|                                         | Interleukin 1-β                                       | M98820           | 512 ± 78                    |           | 567 ± 81                      | 1.1         | 0.4516  |                   | ↑ <sup>(54)</sup>       |
|                                         | Interleukin 6                                         | M26745           |                             | A         |                               |             |         |                   | ↑ <sup>(54)</sup>       |
|                                         | Neuropeptide Y                                        | M15880           | 1648 ± 811                  |           | 16,056 ± 1874                 | 9.7         | 0.0019  | **                | ↑ <sup>(6,53)</sup>     |
|                                         | Pituitary adenylate cyclase activating peptide(PACAP) | X80290           | 3455 ± 434                  |           | 12,182 ± 290                  | 3.5         | 0.0000  | ***               | ↑ <sup>(6,55)</sup>     |
|                                         | Somatostatin                                          | M25890           | 12,590 ± 1303               |           | 8470 ± 652                    | -1.5        | 0.0170  | *                 | ↓ <sup>(56)</sup>       |
|                                         | Substance P (δ-preprotachykinin)                      | X56306           | 9634 ± 1789                 |           | 4478 ± 882                    | -2.2        | 0.0220  | *                 | ↓ <sup>(50,56,57)</sup> |
|                                         | Tumor necrosis factor                                 | E02468           |                             | A         |                               |             |         |                   | ↑ <sup>(54)</sup>       |
|                                         | Islet Amyloid Polypeptide(IAPP)                       | X52820           | 431 ± 25                    |           | 91 ± 60                       | -4.7        | 0.0048  | **                | ↓ <sup>(58)</sup>       |
| Pancreatitis-associated protein (Reg-2) | M98049                                                | 143 ± 194        |                             | 2649 ± 39 | 18.5                          | 0.0014      | **      | ↑ <sup>(59)</sup> |                         |
| Ion channels                            | Brain sodium channel III                              | Y00766           | 1033 ± 373                  |           | 1481 ± 195                    | 1.4         | 0.1621  |                   | ↑ <sup>(6,60,61)</sup>  |
|                                         | Voltage-dependent potassium channel protein           | X12589           | 17,880 ± 4566               |           | 16,984 ± 4118                 | -1.1        | 0.8133  |                   | ↓ <sup>(62)</sup>       |
|                                         | Voltage-gated sodium channel (SNS)                    | X92184           | 6061 ± 361                  |           | 3209 ± 561                    | -1.9        | 0.0032  | **                | ↓ <sup>(61,63,64)</sup> |

|                                       |                                                  |          |                    |   |                    |      |        |     |                                   |
|---------------------------------------|--------------------------------------------------|----------|--------------------|---|--------------------|------|--------|-----|-----------------------------------|
|                                       | Calcium channel $\alpha$ -2 subunit (CCHL2A)     | M86621   | 7267 $\pm$ 1792    |   | 25,005 $\pm$ 1485  | 3.4  | 0.0002 | *** | $\uparrow$ <sup>(65)</sup>        |
|                                       | Voltage-gated Na channel $\alpha$ subunit (NaN)  | AF059030 | 9894 $\pm$ 349     |   | 4685 $\pm$ 744     | -2.1 | 0.0021 | **  | $\downarrow$ <sup>(64,66)</sup>   |
| Cell cytoskeleton                     | Cytoplasmic $\beta$ -actin                       | V01217   | 57,078 $\pm$ 3838  |   | 53,731 $\pm$ 1322  | -1.1 | 0.2667 |     | $\uparrow$ <sup>(6,67)</sup>      |
|                                       | GAP-43                                           | L21192   | 15,593 $\pm$ 726   |   | 28,364 $\pm$ 1579  | 1.8  | 0.0014 | **  | $\uparrow$ <sup>(6,68)</sup>      |
|                                       | Glial fibrillary acidic protein                  | AF028784 | 1736 $\pm$ 34      |   | 6600 $\pm$ 763     | 3.8  | 0.0080 | **  | $\uparrow$ <sup>(69)</sup>        |
|                                       | Heavy neurofilament polypeptide (NF-H)           | X13804   | 30,252 $\pm$ 6345  |   | 25,354 $\pm$ 913   | -1.2 | 0.3123 |     | $\downarrow$ <sup>(6,70,71)</sup> |
|                                       | Neurofilament protein middle (NF-M)              | Z12152   | 67,966 $\pm$ 6714  |   | 59,993 $\pm$ 445   | -1.1 | 0.1755 |     | $\downarrow$ <sup>(6,70,71)</sup> |
|                                       | Light molecular-weight neurofilament (NF-L)      | AF031880 | 92,359 $\pm$ 16347 |   | 88,311 $\pm$ 10462 | 1.0  | 0.7392 |     | $\downarrow$ <sup>(6,70,71)</sup> |
|                                       | Peripherin                                       | AF031878 | 45,476 $\pm$ 5165  |   | 39,811 $\pm$ 5206  | -1.1 | 0.2519 |     | $\uparrow$ <sup>(6,70,72)</sup>   |
|                                       | $\alpha$ -tubulin                                | V01227   | 78,905 $\pm$ 10273 |   | 69,659 $\pm$ 4157  | -1.1 | 0.2559 |     | $\uparrow$ <sup>(6)</sup>         |
|                                       | Tubulin                                          | AB015946 | 2636 $\pm$ 314     |   | 2055 $\pm$ 46      | -1.3 | 0.0820 |     | $\uparrow$ <sup>(6,73,74)</sup>   |
|                                       | Muscle LIM protein                               | X81193   | 677 $\pm$ 76       |   | 2676 $\pm$ 480     | 4.0  | 0.0167 | *   | $\uparrow$ <sup>(75)</sup>        |
|                                       | Small proline rich protein 1a (EST195714)        | AA891911 | 1063 $\pm$ 205     |   | 3856 $\pm$ 263     | 3.6  | 0.0002 | *** | $\uparrow$ <sup>(8)</sup>         |
| Transcription factors                 | Leucine zipper protein (ATF3)                    | M63282   | 1187 $\pm$ 106     |   | 13,509 $\pm$ 800   | 11.4 | 0.0012 | **  | $\uparrow$ <sup>(76)</sup>        |
|                                       | c-jun                                            | X17163   | 591 $\pm$ 284      |   | 4325 $\pm$ 459     | 7.3  | 0.0007 | *** | $\uparrow$ <sup>(77,78,79)</sup>  |
|                                       | jun-D                                            | D26307   |                    | A |                    |      |        |     | $\uparrow$ <sup>(77,78,79)</sup>  |
| Cell surface/<br>Extracellular matrix | Epididymal glycoprotein (AEG)                    | M31173   | 175 $\pm$ 110      |   | 1319 $\pm$ 587     | 7.5  | 0.0728 |     | $\uparrow$ <sup>(75)</sup>        |
|                                       | H36- $\alpha$ -7 integrin $\alpha$ -chain        | X65036   | 13,182 $\pm$ 529   |   | 20,346 $\pm$ 992   | 1.5  | 0.0015 | **  | $\uparrow$ <sup>(80)</sup>        |
|                                       | 140-kD NCAM                                      | X06564   |                    | A |                    |      |        |     | $\uparrow$ <sup>(81)</sup>        |
|                                       | Neural cell adhesion molecule L1                 | X59149   | 10,773 $\pm$ 1669  |   | 13,014 $\pm$ 1172  | 1.2  | 0.1380 |     | NC <sup>(82)</sup>                |
|                                       | Neuropilin                                       | AF016296 | 2810 $\pm$ 282     |   | 2249 $\pm$ 332     | -1.2 | 0.0914 |     | $\uparrow$ <sup>(83)</sup>        |
|                                       | Ninjurin1                                        | U72660   | 4743 $\pm$ 499     |   | 4611 $\pm$ 307     | 1.0  | 0.7194 |     | $\uparrow$ <sup>(84)</sup>        |
| Enzymes                               | Neuronal nitric oxide synthase                   | U67309   |                    | A |                    |      |        |     | $\uparrow$ <sup>(85,86)</sup>     |
| Cell death / Survival                 | Bax- $\alpha$                                    | U59184   | 12,481 $\pm$ 683   |   | 12,148 $\pm$ 831   | 1.0  | 0.6212 |     | NC <sup>(6,87,88)</sup>           |
|                                       | Bcl-2                                            | L14680   | 2186 $\pm$ 261     |   | 2067 $\pm$ 35      | -1.1 | 0.5127 |     | $\downarrow$ <sup>(87,89)</sup>   |
|                                       | Bcl-xlong                                        | U34963   | 1704 $\pm$ 241     |   | 1645 $\pm$ 386     | 1.0  | 0.8345 |     | $\downarrow$ <sup>(88)</sup>      |
|                                       | Manganese-containing superoxide dismutase(MnSoD) | Y00497   | 3253 $\pm$ 1144    |   | 3607 $\pm$ 553     | 1.1  | 0.6639 |     | $\uparrow$ <sup>(6)</sup>         |
|                                       | Heat shock protein 27                            | M86389   | 19,180 $\pm$ 2006  |   | 55,523 $\pm$ 10563 | 2.9  | 0.0237 | **  | $\uparrow$ <sup>(15)</sup>        |
|                                       | Copper-zinc containing superoxide dismutase      | M21060   | 24,631 $\pm$ 2828  |   | 24,881 $\pm$ 453   | 1.0  | 0.8934 |     | NC <sup>(6)</sup>                 |
| Metabolism                            | Cutaneous fatty acid-binding protein             | S69874   | 32,900 $\pm$ 5376  |   | 50,563 $\pm$ 3593  | 1.5  | 0.0126 | **  | $\uparrow$ <sup>(90)</sup>        |
|                                       | Cyclophilin                                      | M19533   | 40,897 $\pm$ 7071  |   | 38,716 $\pm$ 5193  | -1.1 | 0.6909 |     | NC <sup>(15)</sup>                |

Key to abbreviations, A - Gene judged absent in all arrays; NC – No change; \* p<0.05, \*\* p<0.01, \*\*\* p<0.001.

**Table 1: Comparison of microarray and known regulation data for genes whose expression pattern within the DRG following nerve injury has been studied previously.**
