# Supplementary material
Source: PubMed Central journal article supplement (PMC139981)
Supplement: 1471-2202-3-16-S2.pdf [file 1471-2202-3-16-S2.pdf]

**Table 3 Summary of genes identified as regulated >1.5-fold (p<0.05) in the DRG 3 days after sciatic nerve axotomy.**

| <b>Accession</b> | <b>Description</b>                                                      | <b>Naïve<br/>Mean Signal<br/>(±SD)</b> | <b>3 day Axotomy<br/>Mean Signal<br/>(±SD)</b> | <b>Fold<br/>Change</b> | <b>P value</b> |
|------------------|-------------------------------------------------------------------------|----------------------------------------|------------------------------------------------|------------------------|----------------|
| U70779           | Rattus norvegicus Doc2A mRNA, complete cds                              | 1002 ± 223                             | 370 ± 110                                      | -2.71                  | 0.0231         |
| D90048           | Rat Na <sup>+</sup> , K <sup>+</sup> -ATPase (EC 3.6.1.3) beta2 subunit | 1006 ± 407                             | 2243 ± 430                                     | 2.23                   | 0.02247        |
| L01793           | Rattus norvegicus glycogenin mRNA sequence                              | 10062 ± 1896                           | 5711 ± 617                                     | -1.76                  | 0.04672        |
| M36074           | Rat mineralocorticoid receptor (MR)                                     | 1007 ± 119                             | 664 ± 79                                       | -1.52                  | 0.01864        |
| X06801           | Rat mRNA for vaskular alpha-actin                                       | 1029 ± 408                             | 2707 ± 615                                     | 2.63                   | 0.02216        |
| AA891911         | Rattus norvegicus cDNA, 3' end clone                                    | 1063 ± 205                             | 3856 ± 263                                     | 3.63                   | 0.00019        |
| U12568           | Rattus norvegicus ADP-ribosylation factor-like protein 3 (rard3)        | 1070 ± 97                              | 708 ± 127                                      | -1.51                  | 0.01957        |
| AA892775         | Rattus norvegicus cDNA, 3' end clone                                    | 10702 ± 3948                           | 26572 ± 2127                                   | 2.48                   | 0.00816        |
| AI639484         | Rat mixed-tissue library Rattus norvegicus cDNA clone                   | 10790 ± 398                            | 4273 ± 1107                                    | -2.53                  | 0.00486        |
| AJ131902         | Rattus norvegicus mRNA for GAS-7 protein                                | 10833 ± 2962                           | 18456 ± 2857                                   | 1.7                    | 0.03269        |
| AI102031         | Rattus norvegicus cDNA, 3' end clone                                    | 10851 ± 2006                           | 16501 ± 1904                                   | 1.52                   | 0.02415        |
| S77532           | rE12=helix-loop-helix transcription factor E12 homolog                  | 1086 ± 104                             | 529 ± 204                                      | -2.05                  | 0.02493        |
| X06890           | Rat ras-related mRNA rab4                                               | 1095 ± 29                              | 566 ± 213                                      | -1.94                  | 0.04783        |
| M20721           | Rat proline-rich protein (PRP-1) mRNA, partial cds                      | 1099 ± 203                             | 575 ± 107                                      | -1.91                  | 0.02809        |
| U01227           | Rattus sp. 5HT3 receptor subunit mRNA, partial cds                      | 11057 ± 668                            | 7307 ± 536                                     | -1.51                  | 0.00194        |
| X74978           | R.norvegicus gene for prostatic acid phosphatase, exon 11               | 1107 ± 319                             | 311 ± 200                                      | -3.56                  | 0.02899        |
| AI171966         | Rattus norvegicus cDNA, 3' end clone                                    | 1112 ± 337                             | 1944 ± 340                                     | 1.75                   | 0.03963        |
| AI639196         | Rat mixed-tissue library Rattus norvegicus cDNA clone                   | 1118 ± 96                              | 717 ± 24                                       | -1.56                  | 0.01426        |
| X63744           | R.norvegicus mRNA for glutamate/aspartate transporter protein           | 115 ± 91                               | 386 ± 68                                       | 3.35                   | 0.0168         |
| AA955388         | Rattus norvegicus cDNA, 3' end clone                                    | 1184 ± 220                             | 627 ± 81                                       | -1.89                  | 0.0356         |
| M63282           | Rat leucine zipper protein mRNA, complete cds                           | 1187 ± 106                             | 13510 ± 800                                    | 11.38                  | 0.00119        |
| AA891634         | Rattus norvegicus cDNA, 3' end clone                                    | 1201 ± 207                             | 656 ± 111                                      | -1.83                  | 0.02677        |
| AF090867         | Rattus norvegicus guanosine monophosphate reductase                     | 1207 ± 141                             | 791 ± 179                                      | -1.53                  | 0.03662        |
| AA866369         | Rattus norvegicus cDNA, 3' end clone                                    | 1212 ± 274                             | 598 ± 176                                      | -2.03                  | 0.03887        |
| AA866291         | Rattus norvegicus cDNA, 3' end clone                                    | 1224 ± 123                             | 726 ± 101                                      | -1.68                  | 0.00629        |
| X03347           | REMSVFBR FBR-murine osteosarcoma provirus genome                        | 1241 ± 189                             | 2006 ± 291                                     | 1.62                   | 0.02473        |
| AA894087         | Rattus norvegicus cDNA, 3' end clone                                    | 1249 ± 153                             | 831 ± 181                                      | -1.5                   | 0.03912        |
| AI044716         | Rattus norvegicus cDNA, 3' end clone                                    | 1299 ± 207                             | 712 ± 38                                       | -1.83                  | 0.0353         |
| U72350           | Rattus norvegicus Bcl-xalpha mRNA, complete cds                         | 1315 ± 208                             | 2044 ± 269                                     | 1.55                   | 0.02288        |
| X65036           | R.norvegicus mRNA for H36-alpha7 integrin alpha chain                   | 13183 ± 530                            | 20346 ± 993                                    | 1.54                   | 0.00147        |
| L12025           | Rattus norvegicus tumor-associated glycoprotein E4 (Tage4)              | 132 ± 63                               | 490 ± 67                                       | 3.72                   | 0.00255        |
| AI072943         | Rattus norvegicus cDNA, 3' end clone                                    | 1347 ± 119                             | 608 ± 173                                      | -2.22                  | 0.00532        |
| AA892333         | Rattus norvegicus cDNA, 3' end clone                                    | 13656 ± 2220                           | 22606 ± 1810                                   | 1.66                   | 0.00632        |
| U35774           | Rattus norvegicus cytosolic branch chain aminotransferase               | 14155 ± 1164                           | 21920 ± 2879                                   | 1.55                   | 0.0294         |
| AF054618         | Rattus norvegicus cortactin isoform C mRNA, complete cds                | 1416 ± 231                             | 2237 ± 351                                     | 1.58                   | 0.03475        |
| L32591           | Rattus norvegicus GADD45 mRNA, complete cds                             | 1420 ± 228                             | 7725 ± 1159                                    | 5.44                   | 0.00903        |

|          |                                                                              |              |               |       |         |
|----------|------------------------------------------------------------------------------|--------------|---------------|-------|---------|
| M98049   | Rattus rattus pancreatitis-associated protein (pap) mRNA, complete cds       | 143 ± 194    | 2649 ± 39     | 18.48 | 0.0014  |
| Y13275   | Rattus norvegicus mRNA for D6.1A protein                                     | 14647 ± 1394 | 7161 ± 2535   | -2.05 | 0.01921 |
| S61865   | syndecan=heparan sulfate proteoglycan core protein                           | 148 ± 139    | 1512 ± 185    | 10.19 | 0.00075 |
| L38483   | Rattus norvegicus jagged protein mRNA, complete cds                          | 1487 ± 244   | 930 ± 184     | -1.6  | 0.03804 |
| X61654   | Rat mRNA for ad1-antigen                                                     | 14940 ± 1238 | 26115 ± 1048  | 1.75  | 0.00033 |
| M83679   | Sprague-Dawley (clone LRB9) RAB15 mRNA, complete cds                         | 1535 ± 191   | 2884 ± 398    | 1.88  | 0.01457 |
| X17053   | Rat immediate-early serum-responsive JE gene                                 | 1539 ± 473   | 3864 ± 818    | 2.51  | 0.02079 |
| X65036   | R.norvegicus mRNA for H36-alpha7 integrin alpha chain                        | 15394 ± 648  | 26382 ± 1787  | 1.71  | 0.00431 |
| AA945867 | Rattus norvegicus cDNA, 3' end clone                                         | 1553 ± 216   | 4520 ± 524    | 2.91  | 0.00448 |
| L21192   | Rat GAP-43 gene                                                              | 15593 ± 726  | 28365 ± 1579  | 1.82  | 0.00144 |
| M36151   | Rat MHC class II A-beta RT1.B-b-beta gene, partial cds                       | 1563 ± 190   | 2411 ± 360    | 1.54  | 0.03589 |
| AF040261 | Rattus norvegicus phosphatidylcholine transfer protein (Pctp)                | 1579 ± 117   | 843 ± 143     | -1.87 | 0.00264 |
| X13905   | Rat cDNA for ras-related rab1B protein                                       | 1586 ± 193   | 1022 ± 199    | -1.55 | 0.02439 |
| X12459   | Rat mRNA for argininosuccinate synthetase (EC 6.3.4.5)                       | 1611 ± 472   | 487 ± 342     | -3.31 | 0.03324 |
| AA799773 | Rattus norvegicus cDNA, 3' end clone                                         | 1616 ± 172   | 3083 ± 61     | 1.91  | 0.00197 |
| X56747   | Rat mRNA for fetal intestinal lactase-phlorizin hydrolase precursor, partial | 1624 ± 311   | 874 ± 190     | -1.86 | 0.03231 |
| AI044508 | Rattus norvegicus cDNA, 3' end clone                                         | 1635 ± 243   | 3557 ± 565    | 2.18  | 0.01591 |
| M15880   | Rat neuropeptide Y mRNA, complete cds                                        | 1649 ± 811   | 16056 ± 1874  | 9.74  | 0.00186 |
| U27767   | Rattus norvegicus RGP4 mRNA, complete cds                                    | 16756 ± 1896 | 9443 ± 2776   | -1.77 | 0.02455 |
| AA875620 | Rattus norvegicus cDNA, 3' end clone                                         | 1685 ± 149   | 2533 ± 235    | 1.5   | 0.0098  |
| U23407   | Rattus norvegicus cellular retinoic acid-binding protein II (CRABP II)       | 1691 ± 80    | 3783 ± 194    | 2.24  | 0.00082 |
| AI229291 | Rattus norvegicus cDNA, 3' end clone                                         | 17081 ± 2059 | 10486 ± 2980  | -1.63 | 0.04048 |
| S65555   | gamma-glutamylcysteine synthetase light chain                                | 1736 ± 116   | 1097 ± 254    | -1.58 | 0.03271 |
| AF028784 | Rattus norvegicus glial fibrillary acidic protein alpha (GFAP) gene          | 1736 ± 34    | 6600 ± 763    | 3.8   | 0.008   |
| J03754   | Rat plasma membrane Ca <sup>2+</sup> ATPase-isoform 2 mRNA, complete cds     | 1742 ± 133   | 1136 ± 44     | -1.53 | 0.00983 |
| J02720   | Rat liver arginase mRNA, complete cds                                        | 177 ± 134    | 1557 ± 61     | 8.78  | 0.00075 |
| AA874803 | Rattus norvegicus cDNA, 3' end clone                                         | 178 ± 232    | 869 ± 47      | 4.89  | 0.03144 |
| AA891631 | Rattus norvegicus cDNA, 3' end clone                                         | 1808 ± 158   | 903 ± 195     | -2    | 0.00384 |
| AI228407 | Rattus norvegicus cDNA, 3' end clone                                         | 1816 ± 336   | 7210 ± 1650   | 3.97  | 0.02587 |
| S56508   | phosphatidylinositol 4-kinase [rats, brain, mRNA, 2573 nt]                   | 1823 ± 225   | 1130 ± 201    | -1.61 | 0.01684 |
| M11597   | Rat alpha-type calcitonin gene-related peptide mRNA, complete cds            | 18580 ± 795  | 11461 ± 2223  | -1.62 | 0.02111 |
| AI070721 | Rattus norvegicus cDNA, 3' end clone                                         | 1862 ± 253   | 4361 ± 633    | 2.34  | 0.01166 |
| M86389   | Rat heat shock protein (Hsp27) mRNA, complete cds                            | 19180 ± 2006 | 55523 ± 10564 | 2.89  | 0.02373 |
| D85435   | Rattus norvegicus mRNA for protein kinase C delta-binding protein            | 1921 ± 304   | 2990 ± 343    | 1.56  | 0.016   |
| AI639015 | Rat mixed-tissue library Rattus norvegicus cDNA clone rx00967 3              | 196 ± 26     | 125 ± 30      | -1.56 | 0.03705 |
| D23676   | Rat mRNA for regenerating protein III (reg III), complete cds                | 198 ± 50     | 352 ± 69      | 1.78  | 0.0398  |
| U67081   | Rattus norvegicus C2-HC type zinc finger protein r-MyT2                      | 2021 ± 142   | 1016 ± 161    | -1.99 | 0.00135 |
| M83561   | Rattus norvegicus glutamate receptor subunit 5-2 (GluR5-2), kainate subtype  | 2028 ± 305   | 822 ± 149     | -2.47 | 0.00951 |
| AI012534 | Rattus norvegicus cDNA, 3' end clone                                         | 2048 ± 215   | 1063 ± 113    | -1.93 | 0.00574 |
| E00717   | cytochrome P-450 from Rat Liver                                              | 2052 ± 244   | 1324 ± 264    | -1.55 | 0.02507 |
| H31313   | Rattus norvegicus cDNA, 3' end clone                                         | 2075 ± 75    | 4850 ± 581    | 2.34  | 0.01319 |
| J05519   | Rat C1-tetrahydrofolate synthase mRNA, complete cds                          | 2078 ± 250   | 1363 ± 275    | -1.52 | 0.02941 |

|          |                                                                        |              |              |       |         |
|----------|------------------------------------------------------------------------|--------------|--------------|-------|---------|
| M38061   | Rattus norvegicus glutamate receptor (GluR-B) mRNA, complete cds       | 208 ± 48     | 100 ± 34     | -2.09 | 0.03833 |
| AA893717 | Rattus norvegicus cDNA, 3' end clone                                   | 2093 ± 84    | 1278 ± 137   | -1.64 | 0.00208 |
| L20427   | Rattus norvegicus dihydroxypolyprenylbenzoate methyltransferase        | 2144 ± 168   | 1254 ± 115   | -1.71 | 0.00264 |
| D38380   | Rattus norvegicus mRNA for transferrin, complete cds                   | 2153 ± 1703  | 6104 ± 783   | 2.83  | 0.03953 |
| M58364   | Rat GTP cyclohydrolase I mRNA, complete cds                            | 222 ± 12     | 1605 ± 194   | 7.22  | 0.00637 |
| M34643   | Rat neurotrophin-3 (HDNF/NT-3) mRNA, complete cds                      | 2235 ± 140   | 1359 ± 49    | -1.64 | 0.00432 |
| X14254   | Rat mRNA for MHC class II-associated invariant chain                   | 2243 ± 485   | 5117 ± 782   | 2.28  | 0.00931 |
| S57478   | lipocortin I [rats, Genomic, 361 nt, segment 13 of 13]                 | 2288 ± 321   | 4075 ± 467   | 1.78  | 0.00769 |
| AA925752 | Rattus norvegicus cDNA, 3' end clone                                   | 229 ± 53     | 456 ± 59     | 1.99  | 0.00816 |
| AF027954 | Rattus norvegicus Bcl-2-related ovarian killer protein (Bok)           | 2333 ± 21    | 3778 ± 320   | 1.62  | 0.01564 |
| M36453   | Rat inhibin alpha-subunit mRNA, complete cds                           | 2338 ± 304   | 1514 ± 169   | -1.54 | 0.02429 |
| AA893002 | Rattus norvegicus cDNA, 3' end clone                                   | 2358 ± 107   | 1386 ± 248   | -1.7  | 0.01109 |
| AA891737 | Rattus norvegicus cDNA, 3' end clone                                   | 2380 ± 220   | 1572 ± 110   | -1.51 | 0.0113  |
| U29174   | Rattus norvegicus paired-like homeodomain transcription factor (DRG11) | 2386 ± 242   | 1234 ± 205   | -1.93 | 0.00355 |
| M36410   | Rat sepiapterin reductase mRNA, partial cds                            | 2475 ± 697   | 5043 ± 570   | 2.04  | 0.00862 |
| X76454   | R.norvegicus (Sprague Dawley) ri1 mRNA                                 | 2511 ± 468   | 4671 ± 654   | 1.86  | 0.01218 |
| AI639395 | Rat mixed-tissue library Rattus norvegicus cDNA clone rx03054 3        | 256 ± 66     | 509 ± 50     | 1.99  | 0.00739 |
| Y17048   | Rattus norvegicus mRNA for caldendrin                                  | 2596 ± 318   | 1634 ± 156   | -1.59 | 0.01946 |
| AI639263 | Rat mixed-tissue library Rattus norvegicus cDNA clone rx04779 3        | 264 ± 42     | 174 ± 38     | -1.52 | 0.04907 |
| AA799732 | Rattus norvegicus cDNA, 3' end clone                                   | 2645 ± 330   | 4809 ± 828   | 1.82  | 0.03197 |
| J05122   | Rat peripheral-type benzodiazepine receptor (PKBS)                     | 2664 ± 314   | 4148 ± 459   | 1.56  | 0.01319 |
| L03201   | Rattus norvegicus cathepsin S mRNA, complete cds                       | 2689 ± 484   | 5273 ± 508   | 1.96  | 0.00312 |
| X59864   | Rat ASM15 gene                                                         | 2724 ± 358   | 6708 ± 503   | 2.46  | 0.00062 |
| U59672   | Rattus norvegicus 5HT3 receptor mRNA, complete cds                     | 2750 ± 254   | 1413 ± 276   | -1.95 | 0.00358 |
| X15705   | Rat testis-specific heat shock protein-related gene hst70              | 2787 ± 77    | 4635 ± 245   | 1.66  | 0.00309 |
| Y17606   | Rattus norvegicus mRNA for potassium channel, alpha subunit (Kv9.1)    | 2825 ± 528   | 1192 ± 245   | -2.37 | 0.01912 |
| J02773   | Rat low molecular weight fatty acid binding protein mRNA, complete cds | 2837 ± 436   | 1853 ± 301   | -1.53 | 0.03841 |
| AF029310 | Rattus norvegicus vanilloid receptor subtype 1 mRNA, complete cds      | 2860 ± 236   | 1551 ± 28    | -1.84 | 0.00985 |
| J05495   | Rat Gal/GalNAc-specific lectin mRNA, complete cds                      | 291 ± 203    | 838 ± 127    | 2.88  | 0.02329 |
| M90518   | Rat meotropic glutamate receptor (GLUR4) mRNA, complete cds            | 2916 ± 169   | 1616 ± 349   | -1.8  | 0.01127 |
| X58631   | Rat mRNA for protein-tyrosine kinase                                   | 2967 ± 655   | 4519 ± 522   | 1.52  | 0.03495 |
| AA998683 | Rattus norvegicus cDNA, 3' end clone                                   | 30005 ± 9361 | 73670 ± 6896 | 2.46  | 0.00384 |
| AI230130 | Rattus norvegicus cDNA, 3' end clone                                   | 3005 ± 604   | 4989 ± 649   | 1.66  | 0.01804 |
| X70662   | R.norvegicus mRNA for K+ channel protein, beta subunit                 | 3032 ± 620   | 1538 ± 530   | -1.97 | 0.03492 |
| AA900582 | Rattus norvegicus cDNA, 3' end clone                                   | 3045 ± 673   | 5311 ± 376   | 1.74  | 0.0131  |
| AI176658 | Rattus norvegicus cDNA, 3' end clone                                   | 30743 ± 9051 | 75302 ± 8105 | 2.45  | 0.00328 |
| AF026529 | Rattus norvegicus stathmin-like-protein splice variant RB3             | 3126 ± 587   | 7757 ± 42    | 2.48  | 0.00512 |
| AI010453 | Rattus norvegicus cDNA, 3' end clone                                   | 3129 ± 241   | 5609 ± 123   | 1.79  | 0.00056 |
| AA800814 | Rattus norvegicus cDNA, 3' end clone                                   | 3133 ± 47    | 2081 ± 104   | -1.51 | 0.00079 |
| S69329   | isl-1=homeobox [rats, keratinocytes, islet cell line RIN1056A          | 3141 ± 413   | 1705 ± 136   | -1.84 | 0.0184  |
| D38380   | Rattus norvegicus mRNA for transferrin, complete cds                   | 3141 ± 684   | 5616 ± 683   | 1.79  | 0.0114  |
| AI169327 | Rattus norvegicus cDNA, 3' end clone                                   | 3159 ± 526   | 9053 ± 853   | 2.87  | 0.00127 |

|          |                                                                           |              |              |       |         |
|----------|---------------------------------------------------------------------------|--------------|--------------|-------|---------|
| D14839   | Rat mRNA for FGF-9, complete cds                                          | 3165 ± 589   | 1602 ± 301   | -1.98 | 0.02676 |
| X13044   | Rat mRNA for MHC-associated invariant chain gamma                         | 3195 ± 988   | 7454 ± 1583  | 2.33  | 0.02352 |
| X74293   | R.norvegicus mRNA for alpha 7A integrin                                   | 3197 ± 199   | 5664 ± 436   | 1.77  | 0.00388 |
| AA859829 | Rattus norvegicus cDNA, 3 end clone                                       | 3267 ± 337   | 1994 ± 394   | -1.64 | 0.0138  |
| S69874   | C-FABP=cutaneous fatty acid-binding protein                               | 32900 ± 5376 | 50563 ± 3593 | 1.54  | 0.01263 |
| AA799641 | Rattus norvegicus cDNA, 3 end clone                                       | 3330 ± 195   | 2198 ± 263   | -1.52 | 0.00501 |
| AA875527 | Rattus norvegicus cDNA, 3 end clone                                       | 338 ± 64     | 196 ± 52     | -1.72 | 0.04253 |
| L32591   | Rattus norvegicus GADD45 mRNA, complete cds                               | 3394 ± 195   | 14021 ± 644  | 4.13  | 0.00052 |
| AA818025 | Rattus norvegicus cDNA, 3 end clone                                       | 34173 ± 1839 | 51826 ± 6426 | 1.52  | 0.03331 |
| X55572   | R.norvegicus Apo D mRNA                                                   | 34451 ± 6180 | 57110 ± 5134 | 1.66  | 0.00884 |
| X80290   | RRPITACA R.rattus mRNA for pituitary adenylate cyclase activating peptide | 3466 ± 434   | 12182 ± 291  | 3.51  | 0.00003 |
| AI175959 | Rattus norvegicus cDNA, 3 end clone                                       | 3473 ± 594   | 11020 ± 1740 | 3.17  | 0.0107  |
| X59864   | Rat ASM15 gene                                                            | 351 ± 136    | 5089 ± 1862  | 14.51 | 0.04716 |
| AA892789 | Rattus norvegicus cDNA, 3 end clone                                       | 3600 ± 456   | 2267 ± 215   | -1.59 | 0.02192 |
| AA799645 | Rattus norvegicus cDNA, 3 end clone                                       | 3629 ± 327   | 8094 ± 283   | 2.23  | 0.00007 |
| AA891940 | Rattus norvegicus cDNA, 3 end clone                                       | 3674 ± 624   | 6873 ± 437   | 1.87  | 0.00288 |
| AF036537 | Rattus norvegicus homocysteine respondent protein HCYP2                   | 37 ± 34      | 272 ± 61     | 7.38  | 0.00903 |
| X66693   | R.norvegicus mRNA for granzyme-like protein I                             | 377 ± 123    | 1264 ± 213   | 3.35  | 0.00689 |
| J05132   | Rat 3-methylcholanthrene-inducible truncated UDP-glucuronosyltransferase  | 3786 ± 840   | 5842 ± 680   | 1.54  | 0.03201 |
| M74223   | Rat VGF mRNA, complete cds                                                | 3791 ± 619   | 10200 ± 748  | 2.69  | 0.0004  |
| AA894330 | Rattus norvegicus cDNA, 3 end clone                                       | 3818 ± 391   | 7114 ± 104   | 1.86  | 0.00287 |
| AA900413 | Rattus norvegicus cDNA, 3 end clone                                       | 3983 ± 606   | 6017 ± 874   | 1.51  | 0.03511 |
| M32062   | Rat Fc-gamma receptor mRNA, complete cds                                  | 401 ± 146    | 946 ± 153    | 2.36  | 0.0111  |
| U97142   | Rattus norvegicus RET ligand 1 (RETL1) mRNA, complete cds                 | 4132 ± 755   | 8443 ± 581   | 2.04  | 0.00186 |
| D63886   | Rattus sp. mRNA for MT3-MMP-del, complete cds                             | 414 ± 154    | 997 ± 73     | 2.41  | 0.01104 |
| M86235   | Rat ketohexokinase mRNA, complete cds                                     | 4187 ± 396   | 2785 ± 128   | -1.5  | 0.01776 |
| E03424   | GTP cyclohydrolase I                                                      | 42 ± 1       | 694 ± 39     | 16.36 | 0.0012  |
| X52820   | R.norvegicus IAPP gene, exons 1 & 2 (and joined CDS)                      | 431 ± 25     | 91 ± 61      | -4.72 | 0.00484 |
| AJ224879 | Rattus norvegicus mRNA for collagen alpha 1 type II, partial CDS          | 4335 ± 622   | 2376 ± 861   | -1.82 | 0.03778 |
| Z96106   | Rattus norvegicus mRNA for potassium channel r-ERG                        | 4401 ± 414   | 2636 ± 370   | -1.67 | 0.00549 |
| AA800199 | Rattus norvegicus cDNA, 3 end clone                                       | 4411 ± 335   | 7832 ± 169   | 1.78  | 0.00059 |
| U52103   | Rattus norvegicus rCRMP-3 mRNA, partial cds                               | 4417 ± 605   | 2682 ± 91    | -1.65 | 0.03571 |
| M76426   | Rattus norvegicus dipeptidyl aminopeptidase-related protein (dpp6)        | 4464 ± 800   | 2531 ± 450   | -1.76 | 0.03279 |
| D49395   | Rat mRNA for serotonin 5-HT3 receptor, complete cds                       | 4532 ± 549   | 2914 ± 240   | -1.56 | 0.02256 |
| AA892511 | Rattus norvegicus cDNA, 3 end clone                                       | 4594 ± 523   | 2731 ± 580   | -1.68 | 0.01477 |
| AJ004858 | Rattus norvegicus mRNA for Sry-related HMG-box protein Sox11              | 464 ± 77     | 1761 ± 160   | 3.79  | 0.00133 |
| AJ009698 | Rattus norvegicus mRNA for embigin protein                                | 4749 ± 489   | 3115 ± 104   | -1.52 | 0.02446 |
| AI112516 | Rattus norvegicus cDNA, 3 end clone                                       | 4919 ± 1160  | 7686 ± 744   | 1.56  | 0.03287 |
| AA893280 | Rattus norvegicus cDNA, 3 end clone                                       | 4945 ± 209   | 11927 ± 1381 | 2.41  | 0.0114  |
| M81642   | Rat G-protein coupled thrombin receptor mRNA, complete cds                | 4948 ± 209   | 2663 ± 521   | -1.86 | 0.00894 |
| M15562   | Rat MHC class II RT1.u-D-alpha chain mRNA, 3 end                          | 4954 ± 976   | 10088 ± 251  | 2.04  | 0.00848 |
| U50736   | Rattus norvegicus cardiac adriamycin responsive protein                   | 499 ± 188    | 1701 ± 187   | 3.41  | 0.00142 |

|          |                                                                                 |             |              |       |         |
|----------|---------------------------------------------------------------------------------|-------------|--------------|-------|---------|
| D00688   | Rat monoamine oxidase A gene, complete cds                                      | 5022 ± 811  | 7902 ± 1038  | 1.57  | 0.02144 |
| AA799421 | Rattus norvegicus cDNA, 3' end clone                                            | 5063 ± 372  | 2459 ± 233   | -2.06 | 0.00118 |
| U23769   | Rattus norvegicus CLP36 (clp36) mRNA, complete cds                              | 5124 ± 532  | 11527 ± 666  | 2.25  | 0.00027 |
| U02322   | Rattus norvegicus clone ndf42a neu differentiation factor                       | 5143 ± 1075 | 2025 ± 571   | -2.54 | 0.02061 |
| AA799440 | Rattus norvegicus cDNA, 3' end clone                                            | 524 ± 131   | 177 ± 117    | -2.95 | 0.02726 |
| AF083269 | Rattus norvegicus p41-Arc mRNA, complete cds                                    | 5304 ± 558  | 9780 ± 1423  | 1.84  | 0.02072 |
| U17919   | Rattus norvegicus allograft inflammatory factor-1 mRNA, complete cds            | 541 ± 120   | 1088 ± 199   | 2.01  | 0.02219 |
| U12187   | Rattus norvegicus ras-related protein (rad) mRNA, complete cds                  | 553 ± 327   | 1361 ± 53    | 2.46  | 0.04721 |
| M93669   | Rat secretogranin II mRNA, complete cds                                         | 5580 ± 1169 | 2347 ± 674   | -2.38 | 0.02245 |
| AA859520 | Rattus norvegicus cDNA, 3' end clone                                            | 5616 ± 954  | 2970 ± 633   | -1.89 | 0.02114 |
| AA893180 | Rattus norvegicus cDNA, 3' end clone                                            | 566 ± 196   | 1021 ± 124   | 1.8   | 0.03542 |
| U97143   | Rattus norvegicus RET ligand 2 (RETL2) mRNA, complete cds                       | 5666 ± 302  | 3264 ± 477   | -1.74 | 0.00339 |
| U42719   | Rattus norvegicus C4 complement protein mRNA, partial cds                       | 570 ± 260   | 4119 ± 326   | 7.23  | 0.00017 |
| M82826   | Rattus leucopus neurofibromatosis protein type I (NF1, type III splice variant) | 572 ± 96    | 340 ± 99     | -1.68 | 0.04384 |
| L01793   | Rattus norvegicus glycogenin mRNA sequence                                      | 5732 ± 562  | 3307 ± 338   | -1.73 | 0.00584 |
| M18331   | Rat protein kinase C epsilon subspecies                                         | 5764 ± 243  | 3080 ± 75    | -1.87 | 0.00131 |
| AA874803 | Rattus norvegicus cDNA, 3' end clone                                            | 577 ± 33    | 1174 ± 131   | 2.04  | 0.01178 |
| D45412   | brain-enriched membrane-associated protein tyrosine phosphatase (BSM)-1         | 587 ± 145   | 1081 ± 74    | 1.84  | 0.01357 |
| AA892801 | Rattus norvegicus cDNA, 3' end clone                                            | 5896 ± 1590 | 10578 ± 108  | 1.79  | 0.03581 |
| S66024   | transcriptional repressor CREM [rats, pineal gland, mRNA, 436 nt]               | 59 ± 11     | 782 ± 171    | 13.36 | 0.01775 |
| X17163   | Rat c-jun oncogene mRNA for transcription factor AP-1                           | 591 ± 284   | 4326 ± 459   | 7.32  | 0.00074 |
| AA892400 | Rattus norvegicus cDNA, 3' end clone                                            | 5912 ± 550  | 3726 ± 331   | -1.59 | 0.00753 |
| L07736   | Rat carnitine palmitoyltransferase I mRNA, complete cds                         | 5978 ± 128  | 3919 ± 413   | -1.53 | 0.00838 |
| U08976   | Rattus norvegicus Wistar peroxisomal enoyl hydratase-like protein (PXEL)        | 5993 ± 531  | 3958 ± 476   | -1.51 | 0.00805 |
| X92184   | R.norvegicus mRNA for voltage-gated sodium channel (SNS)                        | 6061 ± 361  | 3209 ± 561   | -1.89 | 0.00324 |
| AA875017 | Rattus norvegicus cDNA, 3' end clone                                            | 6092 ± 698  | 3667 ± 680   | -1.66 | 0.01255 |
| L27843   | Rat tyrosine phosphatase (PRL-1) mRNA, complete cds                             | 6199 ± 523  | 10792 ± 918  | 1.74  | 0.00398 |
| U36772   | Rattus norvegicus glycerol-3-phosphate acyltransferase                          | 635 ± 60    | 1093 ± 129   | 1.72  | 0.01343 |
| U44091   | Rattus norvegicus atrophin-1 related protein (rARP) mRNA, complete cds          | 665 ± 104   | 412 ± 94     | -1.61 | 0.03614 |
| X62839   | R.rattus mRNA for potassium channel protein (3120 bp)                           | 665 ± 42    | 398 ± 114    | -1.67 | 0.04225 |
| M57263   | Rat protein-glutamine gamma-glutamyltransferase mRNA, complete cds              | 67 ± 16     | 1085 ± 113   | 16.14 | 0.00353 |
| X81193   | R.norvegicus mRNA for muscle LIM protein                                        | 677 ± 76    | 2676 ± 480   | 3.95  | 0.01675 |
| AF028784 | Rattus norvegicus glial fibrillary acidic protein alpha (GFAP) gene             | 690 ± 230   | 1222 ± 183   | 1.77  | 0.03744 |
| AA944014 | Rattus norvegicus cDNA, 3' end clone                                            | 694 ± 364   | 1511 ± 216   | 2.18  | 0.03936 |
| U10894   | Rattus norvegicus mRNA expressed in carotid artery tissue                       | 702 ± 135   | 1617 ± 108   | 2.3   | 0.00097 |
| D31873   | Rat mRNA for LIMK-1, complete cds                                               | 7038 ± 969  | 4495 ± 128   | -1.57 | 0.04302 |
| AF000899 | Rattus norvegicus p58/p45 mRNA, alternatively spliced form, clone H6, 3' end    | 719 ± 141   | 383 ± 80     | -1.88 | 0.03389 |
| D78588   | Rat mRNA for diacylglycerol kinase, complete cds                                | 7228 ± 1064 | 4491 ± 423   | -1.61 | 0.03325 |
| M86621   | Rat dihydropyridine-sensitive L-type calcium channel alpha-2 subunit (CCHL2A)   | 7267 ± 1792 | 25005 ± 1485 | 3.44  | 0.00023 |
| AA892647 | Rattus norvegicus cDNA, 3' end clone                                            | 733 ± 186   | 1144 ± 175   | 1.56  | 0.04994 |
| U05014   | Rattus norvegicus Sprague/Dawley PHAS-I mRNA, complete cds                      | 739 ± 120   | 1232 ± 213   | 1.67  | 0.03656 |
| S56937   | 3-methylcholanthrene-inducible UDP-glucuronosyltransferase [rats, mRNA, 603 nt] | 748 ± 23    | 1352 ± 241   | 1.81  | 0.04795 |

|          |                                                                                     |             |              |       |         |
|----------|-------------------------------------------------------------------------------------|-------------|--------------|-------|---------|
| M34097   | Rat natural killer (NK) cell protease 1 (RNKP-1) mRNA, complete cds                 | 750 ± 142   | 1274 ± 70    | 1.7   | 0.0114  |
| U78517   | Rattus norvegicus cAMP-regulated guanine nucleotide exchange factor II (cAMP-GEFII) | 754 ± 188   | 337 ± 129    | -2.24 | 0.04025 |
| X02341   | Rat mRNA for vasoactive intestinal polypeptide (VIP) precursor                      | 78 ± 15     | 1720 ± 206   | 21.98 | 0.00501 |
| AA800243 | Rattus norvegicus cDNA, 3' end clone                                                | 783 ± 47    | 1218 ± 185   | 1.55  | 0.04814 |
| U96130   | Rattus norvegicus glycogenin mRNA, partial cds                                      | 7839 ± 943  | 4757 ± 689   | -1.65 | 0.01261 |
| AI169327 | Rattus norvegicus cDNA, 3' end clone                                                | 7871 ± 940  | 16706 ± 383  | 2.12  | 0.00122 |
| L46593   | Rattus norvegicus small proline-rich protein (spr) gene, complete cds               | 8005 ± 350  | 19324 ± 2527 | 2.41  | 0.01483 |
| X61381   | RRIMRNA R. rattus interferon induced mRNA                                           | 8020 ± 665  | 13207 ± 715  | 1.65  | 0.00079 |
| AA866294 | Rattus norvegicus cDNA, 3' end clone                                                | 806 ± 51    | 534 ± 33     | -1.51 | 0.00279 |
| AF072411 | Rattus norvegicus fatty acid translocase/CD36 mRNA, complete cds                    | 811 ± 174   | 1528 ± 246   | 1.88  | 0.01799 |
| Y16188   | Rattus norvegicus mRNA for XCE protein, partial                                     | 817 ± 79    | 1848 ± 213   | 2.26  | 0.00763 |
| AI639308 | Rat mixed-tissue library Rattus norvegicus cDNA clone rx00977 3                     | 829 ± 159   | 460 ± 88     | -1.8  | 0.03661 |
| AA859643 | Rattus norvegicus cDNA, 3' end clone                                                | 8322 ± 200  | 5227 ± 574   | -1.59 | 0.00622 |
| S49400   | striatum enriched phosphatase=protein-tyrosine-phosphatase                          | 848 ± 40    | 2575 ± 338   | 3.03  | 0.01171 |
| AI180288 | Rattus norvegicus cDNA, 3' end clone                                                | 854 ± 135   | 561 ± 101    | -1.52 | 0.04368 |
| J03624   | Rat galanin (a neuropeptide) mRNA, complete cds                                     | 858 ± 269   | 24746 ± 1223 | 28.84 | 0.00053 |
| AF000114 | Rattus norvegicus paranodin mRNA, complete cds                                      | 8590 ± 244  | 5298 ± 1379  | -1.62 | 0.04992 |
| AA925717 | Rattus norvegicus cDNA similar to Mus mus apoptosis associated tyrosine kinase      | 8667 ± 606  | 5638 ± 900   | -1.54 | 0.01167 |
| M65149   | Rat CELF mRNA, complete cds                                                         | 870 ± 36    | 1851 ± 189   | 2.13  | 0.01008 |
| U09540   | Rattus norvegicus Sprague-Dawley cytochrome P450 (CYP1B1)                           | 879 ± 96    | 1815 ± 32    | 2.07  | 0.00157 |
| X71127   | R.norvegicus mRNA for complement protein C1q beta chain                             | 880 ± 255   | 2923 ± 560   | 3.32  | 0.01266 |
| AA892014 | Rattus norvegicus cDNA, 3' end clone                                                | 884 ± 84    | 511 ± 100    | -1.73 | 0.00829 |
| M23566   | Rattus norvegicus alpha-2-macroglobulin gene, 3' end                                | 8995 ± 1046 | 21057 ± 3221 | 2.34  | 0.01565 |
| X71127   | R.norvegicus mRNA for complement protein C1q beta chain                             | 909 ± 493   | 4497 ± 652   | 4.95  | 0.00213 |
| AF058795 | Rattus norvegicus GABA-B receptor gb2 mRNA, complete cds                            | 9146 ± 1166 | 5593 ± 710   | -1.64 | 0.01655 |
| AI070295 | Rattus norvegicus cDNA, 3' end clone                                                | 918 ± 300   | 2629 ± 593   | 2.86  | 0.0216  |
| U47316   | Rat R2 cerebellum cDNA clone LIAREST-2,                                             | 923 ± 210   | 1415 ± 195   | 1.53  | 0.0413  |
| AF030050 | Rattus norvegicus replication factor C mRNA, partial cds                            | 931 ± 115   | 616 ± 41     | -1.51 | 0.03057 |
| U31203   | Rattus norvegicus noggin (NOGGIN) mRNA, partial cds                                 | 943 ± 166   | 443 ± 6      | -2.13 | 0.03455 |
| E06822   | cDNA encoding 20 alpha-HSD(20 alpha-hydroxysteroid dehydrogenase)                   | 946 ± 89    | 613 ± 46     | -1.54 | 0.0102  |
| D10938   | Rat gene for brain-derived neurotrophic factor (BDNF), complete cds                 | 951 ± 217   | 1509 ± 115   | 1.59  | 0.02861 |
| X56306   | Rat mRNA of delta-preprotachykinin - a splicing variant of substance P precursor    | 9634 ± 1789 | 4478 ± 882   | -2.15 | 0.02201 |
| AF003835 | Rattus norvegicus isopentenyl diphosphate-dimethylallyl diphosphate isomerase       | 9656 ± 1723 | 5996 ± 1432  | -1.61 | 0.04924 |
| M11596   | Rat beta-type calcitonin gene-related peptide mRNA, complete cds                    | 9689 ± 291  | 5922 ± 785   | -1.64 | 0.00777 |
| AJ131902 | Rattus norvegicus mRNA for GAS-7 protein                                            | 9795 ± 1843 | 14945 ± 1328 | 1.53  | 0.02059 |
| AF059030 | Rattus norvegicus voltage-gated Na channel alpha subunit NaN mRNA                   | 9894 ± 349  | 4685 ± 744   | -2.11 | 0.00206 |
