# Supplementary material
Source: PubMed Central journal article supplement (PMC139981)
Supplement: 1471-2202-3-16-S3.pdf [file 1471-2202-3-16-S3.pdf]

| Gene                                                                                       | Expression                                                                                            | Function                                                                                                                                                                        | Role                                                                                             | Regulation |                         |
|--------------------------------------------------------------------------------------------|-------------------------------------------------------------------------------------------------------|---------------------------------------------------------------------------------------------------------------------------------------------------------------------------------|--------------------------------------------------------------------------------------------------|------------|-------------------------|
| <b>GTP cyclohydrolase-1</b>                                                                | CNS (catecholaminergic & serotonergic neurons)                                                        | Rate limiting enzyme for tetrahydrobiopterin (BH4) synthesis. Enzymes that require BH4 as a cofactor include tyrosine and tryptophan hydroxylases and all NO synthase isoforms. | Neurotransmitter metabolism. Neuroprotection via NO synthase.                                    | ↑          | 91, 22, 92.             |
| <b>Endothelin-1</b>                                                                        | DRG (small and large neurons)<br>Widespread in CNS                                                    | Secreted peptide<br>Vasoconstriction and neuromodulation.                                                                                                                       | Neurotransmitter / neuro-hormone – acts on sensory fibers to produce pain.                       | ↑          | 93, 94, 95.             |
| <b>CB1 receptor</b>                                                                        | DRG (large/medium neurons)<br>Spinal cord /CNS                                                        | G-protein coupled receptor (Gi-coupled).                                                                                                                                        | Endogenous cannabinoid receptor – Presynaptic inhibition.                                        | ↓          | 96, 97, 98, 99.         |
| <b>Stromelysin-1</b><br>53 Kd polypeptide.<br>Matrix-Metalloproteinase 3 (MMP3) / Transin. | Widely expressed                                                                                      | Secreted matrix metalloproteinase                                                                                                                                               | Tissue remodeling. Increased invasion of neurites into basal lamina.                             | ↑          | 100, 101, 102, 103.     |
| <b>Monocyte chemoattractant protein-1 (IES-JE)</b>                                         | SCG and Motor neurons (induced by axotomy)<br>Schwann cells (induced in cells distal to nerve injury) | Secreted cytokine chemoattractant.                                                                                                                                              | Triggers recruitment and activation of monocytes to site of injury and infection.                | ↑          | 104, 23, 105, 106, 107. |
| <b>Peripheral benzodiazepine receptor</b>                                                  | Widely expressed (injury regulated).                                                                  | Mitochondrial receptor – Controls cholesterol flow into mitochondria for initiation of steroid hormone synthesis.                                                               | Cell growth & differentiation, steroid biosynthesis – Neurite outgrowth / anti-apoptotic.        | ↑          | 108, 109, 110, 19.      |
| <b>5HT-3A Receptor</b>                                                                     | DRG (neurons)<br>Nodose ganglia (down after axotomy).<br>CNS (widespread)                             | Ionotropic serotonin receptor – non selective cation channel.                                                                                                                   | Pain.                                                                                            | ↓          | 111, 112, 113, 114.     |
| <b>GADD45A</b>                                                                             | CNS (injury induced - neurons and glia).                                                              | Nuclear signaling protein – Growth Arrest and DNA-damage inducible.                                                                                                             | Maintenance of chromosomal DNA stability following damage - anti-apoptotic / cell cycle control. | ↑          | 115, 20, 116, 117.      |
| <b>Phospholemman Channel</b>                                                               | Abundant in skeletal muscle and heart.<br>CNS (astrocytes & supraoptic neurons)                       | Ion channel with a single transmembrane domain – volume sensitive anion channel (Chloride).                                                                                     | Maintenance of constant cell volume, pH regulation, and membrane potential.                      | ↑          | 118, 119, 120, 121.     |
| <b>VGF</b>                                                                                 | DRG (neurons)<br>High levels in hypothalamus.                                                         | Secreted peptide precursor<br>In hypothalamus has a role in energy balance.                                                                                                     | Neurotransmission.                                                                               | ↑          | 122, 123, 124.          |
| <b>CLP36 (Elfin)</b>                                                                       | Abundant in heart and skeletal muscle.                                                                | Cytoplasmic protein associated with the cytoskeleton. Protein trafficking and signal transduction.                                                                              | Cell morphogenesis & migration<br>Neurite outgrowth.                                             | ↑          | 125,126, 127.           |

|                              |                                                                         |                                                                                       |                                                              |   |                     |
|------------------------------|-------------------------------------------------------------------------|---------------------------------------------------------------------------------------|--------------------------------------------------------------|---|---------------------|
| <b>Metallothionein 1L</b>    | Widely expressed. CNS (Motor neurons and astrocytes)                    | Small cytosolic protein. Cysteine-rich heavy metal-binding and free radical scavenger | Antioxidant, prevents apoptosis, protects against DNA damage | ↑ | 128, 21, 129.       |
| <b>Alpha 2 macroglobulin</b> | Macrophage/microglia                                                    | Secreted protein<br>Pan-proteinase inhibitor.                                         | Sequesters growth factors -<br>Modifies neurite outgrowth.   | ↑ | 130, 131, 132, 133. |
| <b>Lysozyme</b>              | Phagocytic macrophages and microglia.                                   | Secreted enzyme<br>Immune response, cell breakdown.                                   | Macrophages have role in damaged cell removal.               | ↑ | 134, 135, 136.      |
| <b>SNAP25</b>                | DRG (neurons)<br>Motor neurons (down regulated by sciatic nerve injury) | With other SNARE proteins, drives intracellular vesicle-plasma membrane fusion.       | Neuro-transmitter release.                                   | ↓ | 137, 138, 139.      |

**Table 3: Summary of expression patterns and functional roles of uncharacterized nerve-injury regulated genes.**

Abbreviations, CNS central nervous system, SCG superior cervical ganglia, SNARE soluble, n-ethylmaleimide-sensitive factor attachment-protein receptors.
